# Supplementary material
Source: Springer Nature journal article supplement (https://www.springermedizin.de/resource/supplementary/13058_2009_2571_MOESM12_ESM.pdf/9701724)

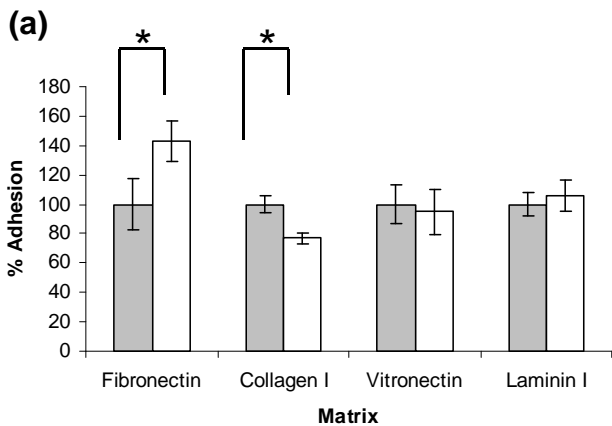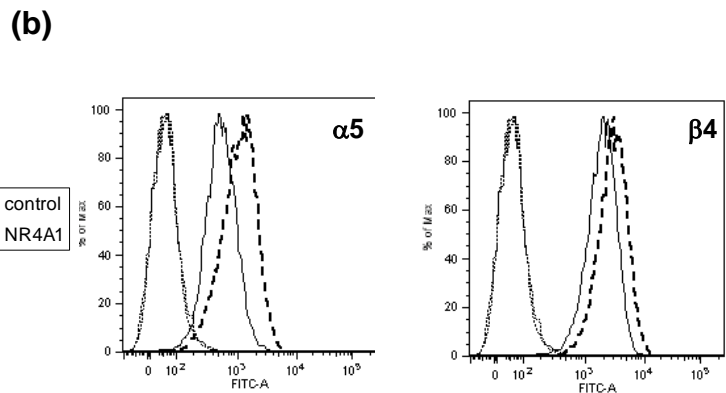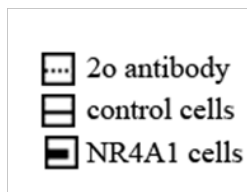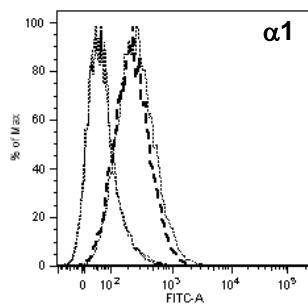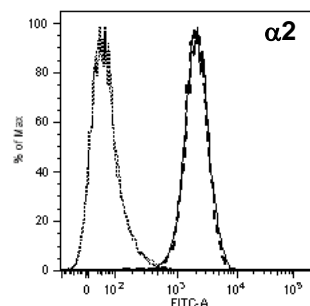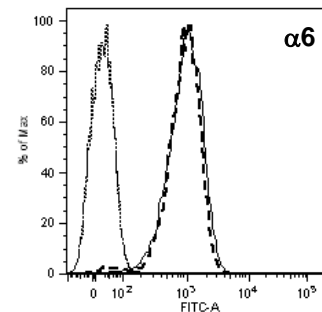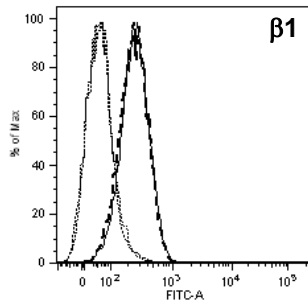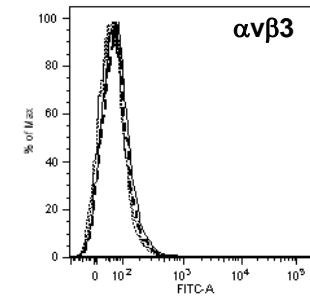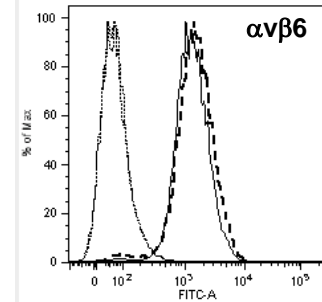

Supplement: MOESM12 [file 9701724]
